# Supplementary material for: Dual mode selective chemosensor for copper and fluoride ions: a fluorometric, colorimetric and theoretical investigation
Source: Royal Society of Chemistry journal article supplement (doi:10.1039/c6dt00968a), 2016-01-01
Supplement: c6dt00968a1.pdf [file c6dt00968a1.pdf]

### Supporting Information

## **Dual mode selective chemosensor for copper and fluoride ions: A fluorimetric, colorimetric and theoretical investigation**

Soumen Ghosh<sup>a</sup>, Aniruddha Ganguly<sup>a</sup>, Md. Raihan Uddin<sup>b</sup>, Sukhendu Mandal<sup>b</sup>, Md. Akhtarul Alam<sup>c\*</sup>, and Nikhil Guchhait<sup>a\*</sup>

<sup>a</sup>Department of Chemistry

University of Calcutta

92, A.P.C. Road, Kolkata 700 009, India

Telephone 91-33-23508386

Fax: 91-33-23519755

<sup>b</sup>Department of Microbiology

University of Calcutta

35, B. C. Road, Ballygunge

Kolkata- 700019

<sup>c</sup>Department of Chemistry

Aliah University

IIA/27, New Town, Kolkata-700 156, West Bengal, India

\*Corresponding author, E-mail: [alam\\_iitg@yahoo.com](mailto:alam_iitg@yahoo.com) (M. A. A.)

and

[nguchhait@yahoo.com](mailto:nguchhait@yahoo.com) (N.G.)

## Table of Contents

|                                                        |     |
|--------------------------------------------------------|-----|
| 1. Characterization.....                               | S4  |
| 2. X-ray Crystallographic Structures.....              | S6  |
| 3. UV-vis Spectra.....                                 | S9  |
| 4. Emission spectra.....                               | S10 |
| 5. Theoretically optimized structure .....             | S15 |
| 6. UV-vis Spectral data of 1 with F <sup>-</sup> ..... | S16 |
| 7. <sup>1</sup> H NMR titration .....                  | S17 |

## 1. Characterization:

### 1.1 $^1\text{H}$ NMR Spectra

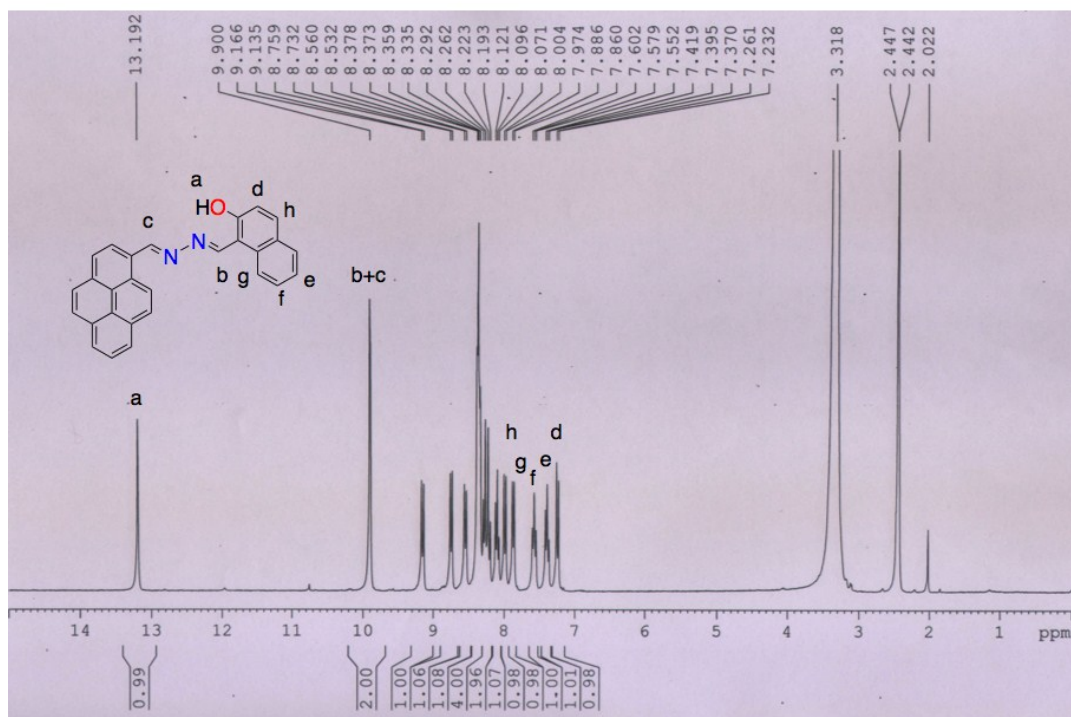

**Fig. S1.**  $^1\text{H}$  NMR (300 MHz) spectrum of **1** in  $d_6$ -DMSO at 20 °C

## 1.2 Mass (TOF-MS ES+) Spectra

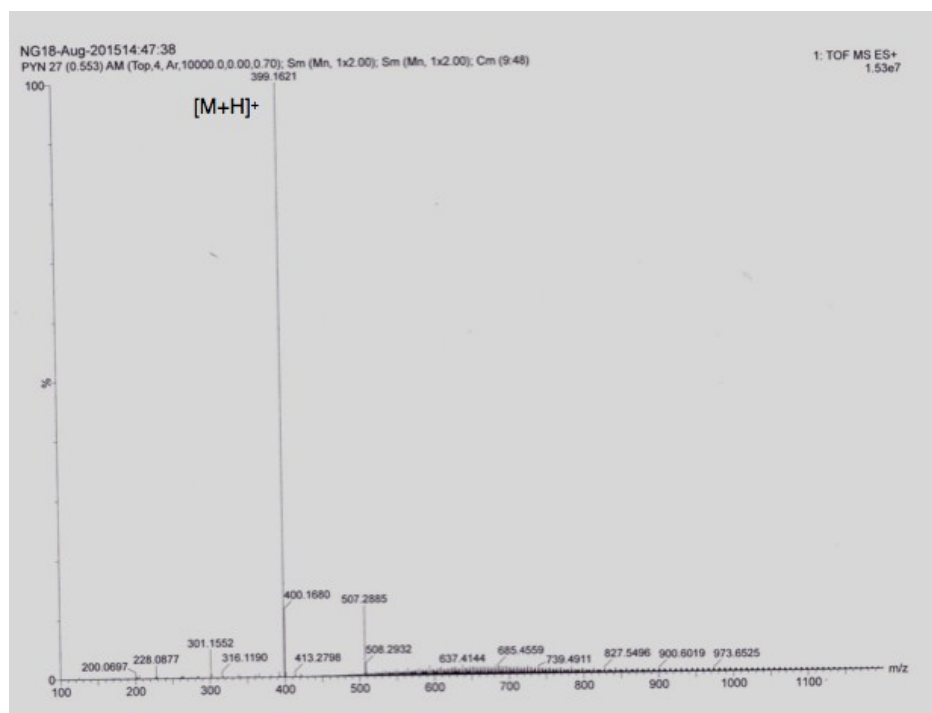

Fig. S2. Mass spectra (TOF-MS ES+) of **1**

## 2. X-ray Crystallographic Structures

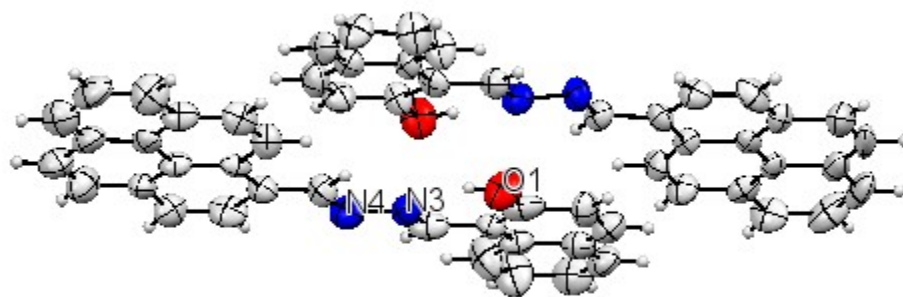

**Fig. S3** ORTEP diagram of **1** (thermal ellipsoids set to 30% probability).

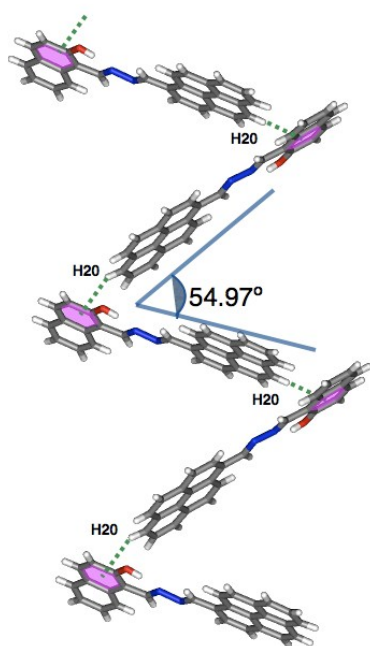

**Fig. S4** 1D polymer through CH... $\pi$  interaction

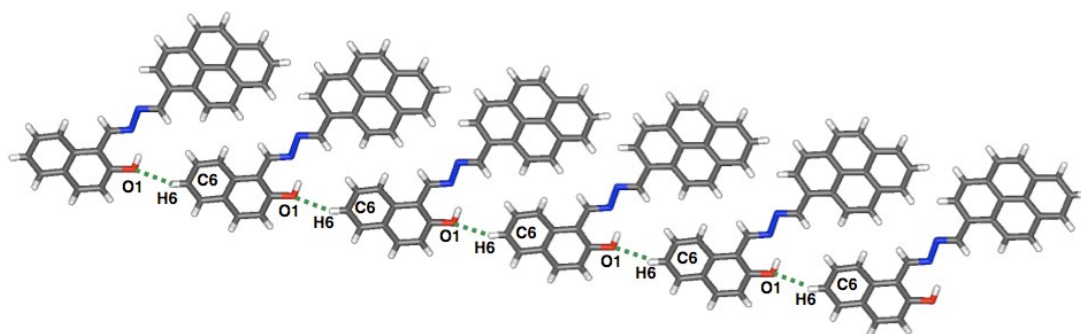

**Fig. S5** 1D polymer through intermolecular H-bonding interaction

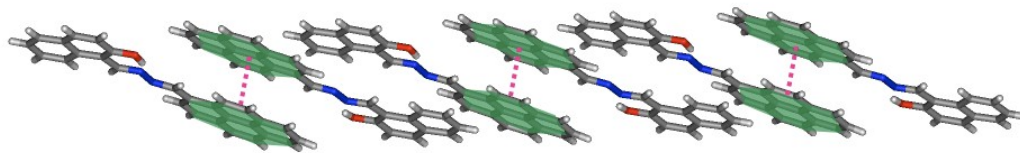

**Fig. S6** Different type of  $\pi \dots \pi$  interaction

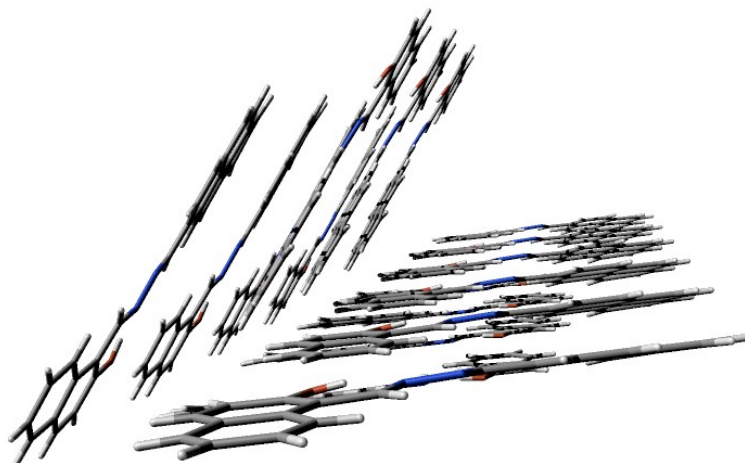

**Fig. S7** 2D polymeric structure of **1**

### 3. UV-Vis Spectra

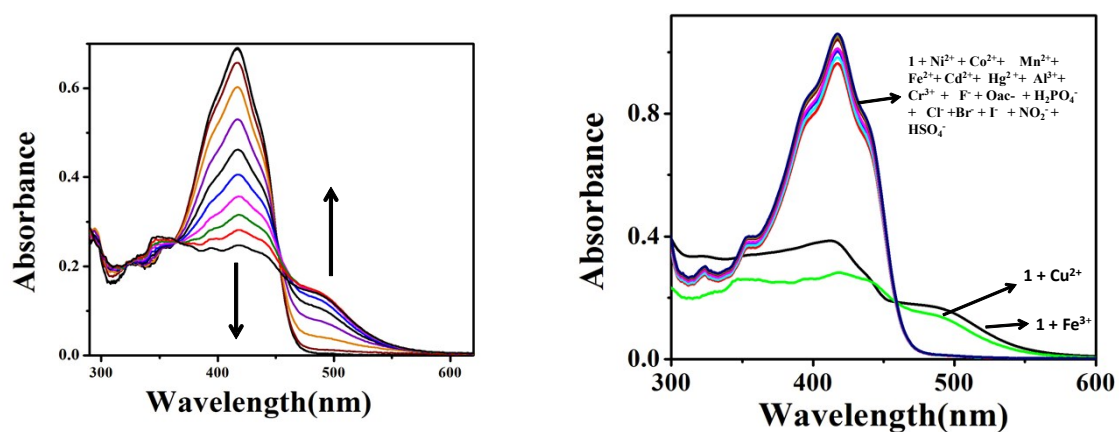

**Fig. S8** UV-vis spectral changes of **1** ( $1.0 \times 10^{-6}$  M) upon addition of (0–2 equiv.) Cu (ClO<sub>4</sub>)<sub>2</sub> in methanol water mixture (7:3, v/v) (left) and UV-vis spectral changes of sensor **1** ( $1 \times 10^{-6}$  M) in presence of various metal ions and anions (2 equiv.) in methanol water mixture (7:3, v/v) (right).



#### 4. Emission Spectra

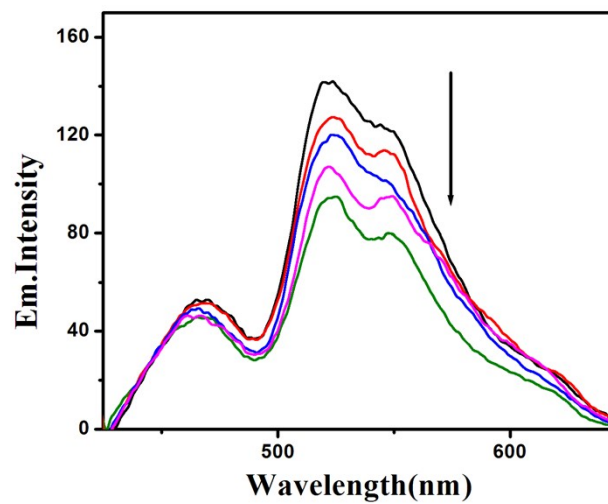

**Fig. S9** Emission spectral changes of Sensor **1** ( $1 \times 10^{-7}$  M) with dilution in methanol water mixture (7:3, v/v).

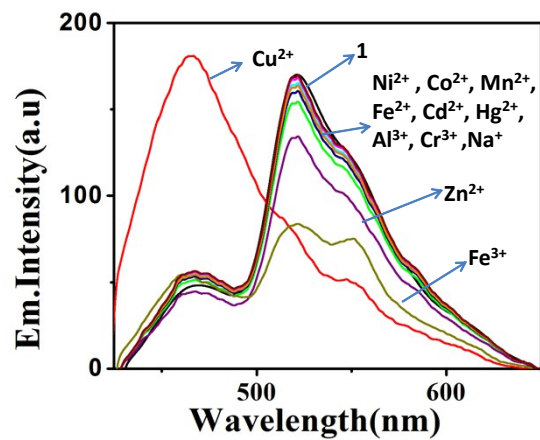

**Fig. S10** Emission spectral changes of sensor **1**( $1 \times 10^{-7}$  M) in presence of various metal ions (2 equiv.) in methanol water mixture (7:3, v/v)

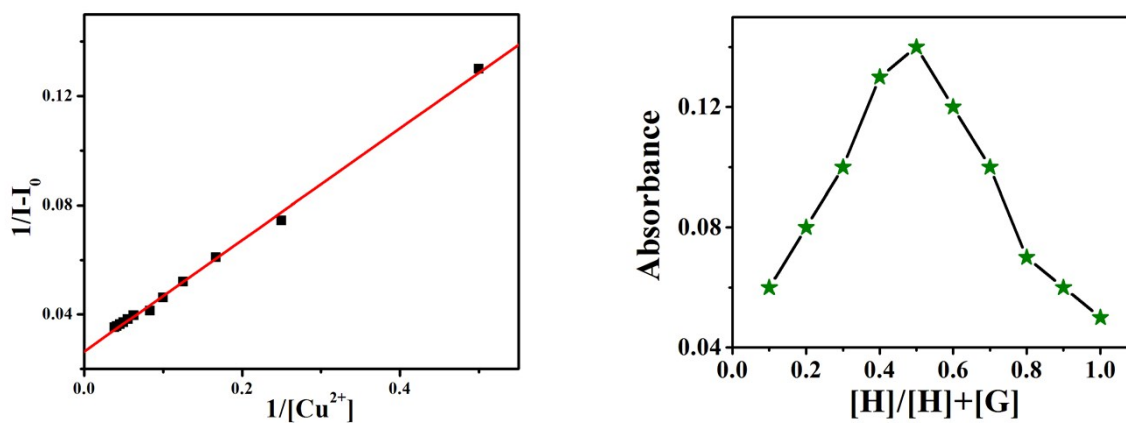

**Fig. S11** B-H plot from fluorescence titration spectra at 466 nm (left) and Job's plot from Uv-vis titration at 490 nm (right) of receptor **1** with  $Cu^{2+}$  showing 1:1 binding stoichiometry.

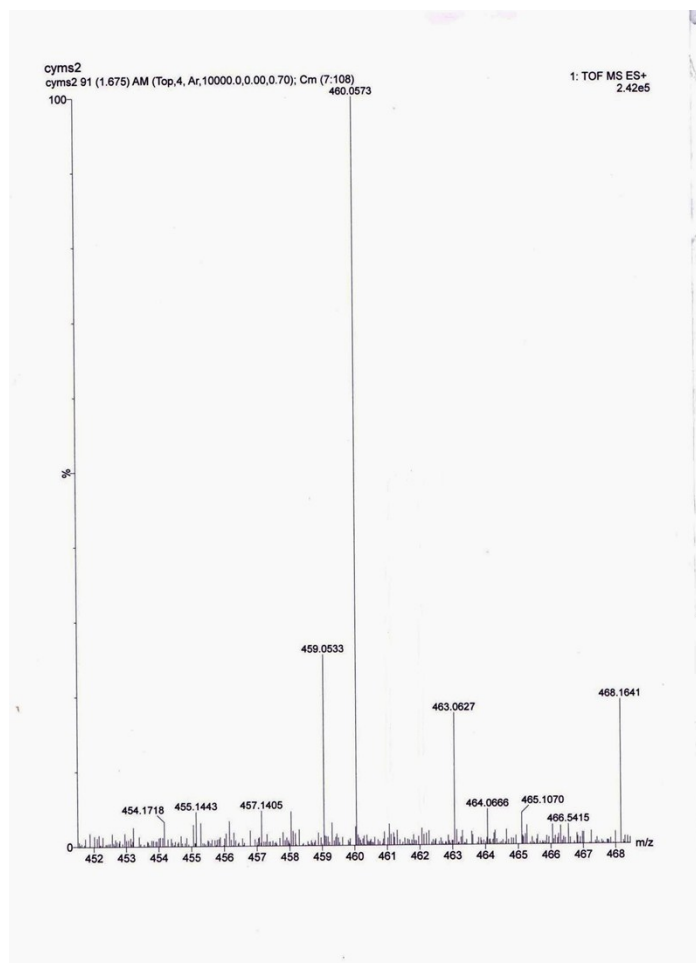

**Fig. S12** Mass spectra (TOF-MS ES+) of **1-Cu<sup>2+</sup>** complex

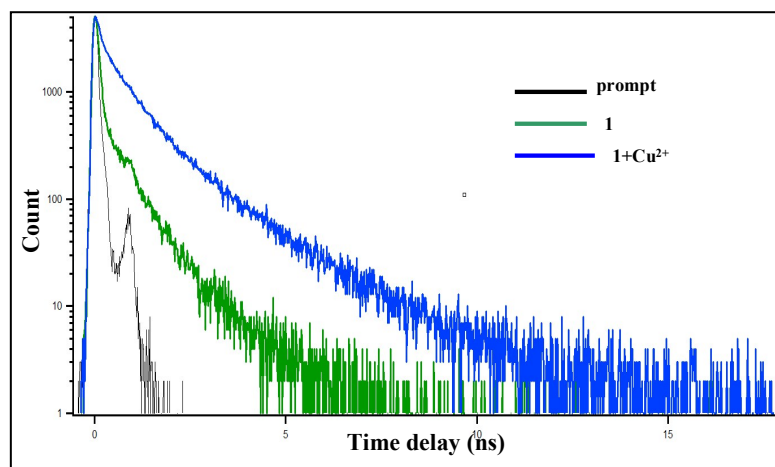

**Fig. S13** Fluorescence decay profile of **1** and **1** in presence of 2 equivalents of  $\text{Cu}^{2+}$ ,  $\lambda_{\text{ex}} = 375 \text{ nm}$ ,  $\lambda_{\text{em (max)}} = 570 \text{ nm}$

## 5. Theoretically optimized structure

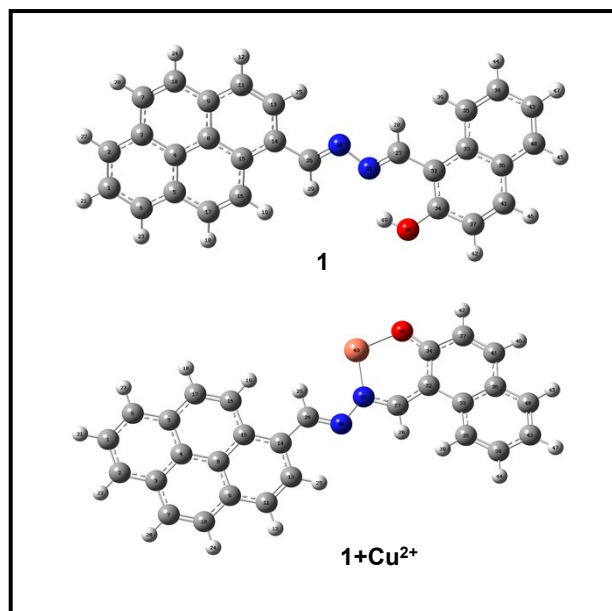

**Fig. S14** Theoretically optimized structure of **1** and **1-Cu<sup>2+</sup>**

## 6. UV-Vis Spectral data of 1 with F<sup>-</sup>

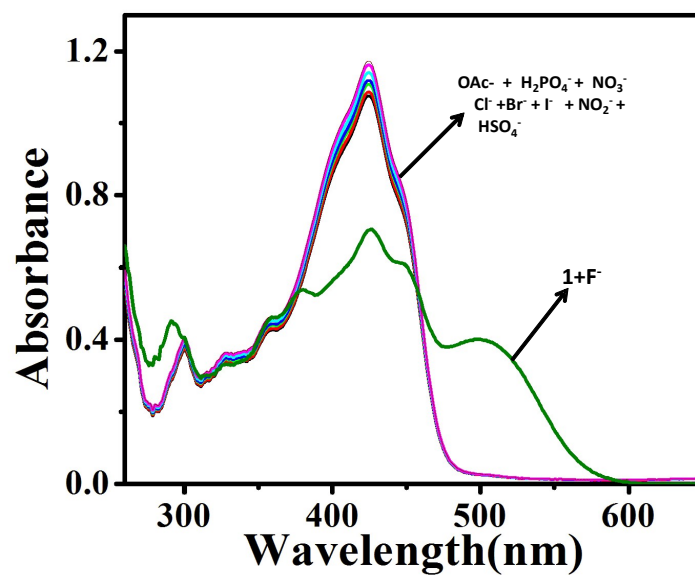

**Fig. S15** UV-Vis spectral changes of sensor **1** ( $1 \times 10^{-6}$  M) in presence of various anions (2 equiv. ) in DMSO-water mixture (7:3, v/v)

### 7. $^1\text{H}$ NMR titration

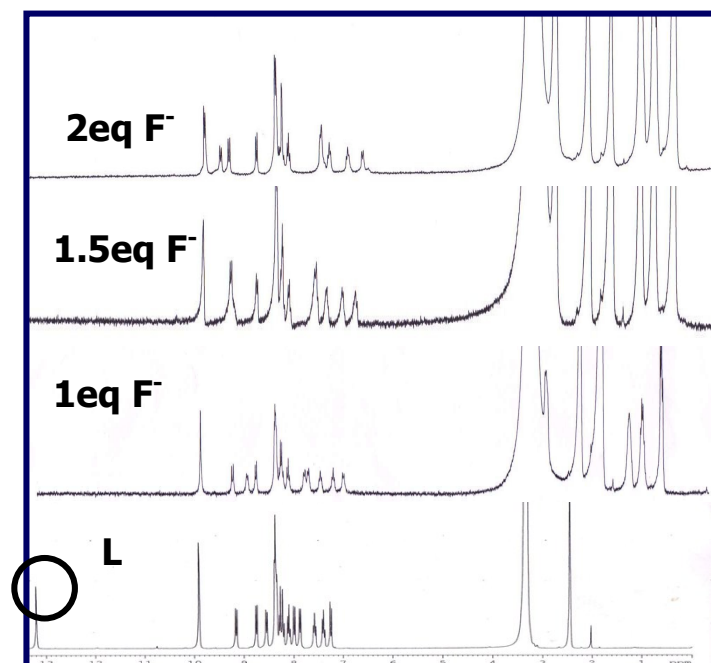

**Fig. S16**  $^1\text{H}$  NMR titration of **1** with tetrabutyl ammonium fluoride in  $\text{DMSO-}d_6$



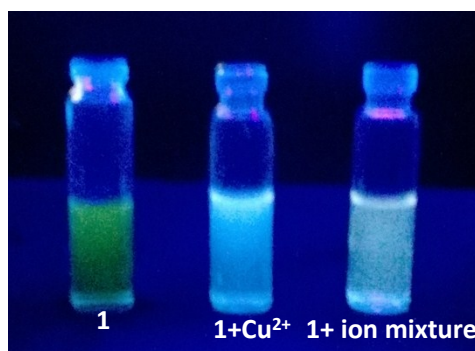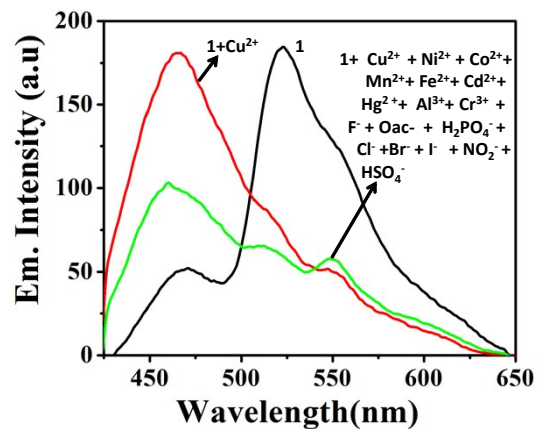

**Fig. S17** Visual fluorescence change of **1** ( $1 \times 10^{-5}$  M) (left) and fluorescence spectra of **1** ( $1 \times 10^{-7}$  M) (right) in bare copper ion and in mixture of ions ( $\text{Cu}^{2+}$ ,  $\text{Ni}^{2+}$ ,  $\text{Co}^{2+}$ ,  $\text{Mn}^{2+}$ ,  $\text{Fe}^{2+}$ ,  $\text{Cd}^{2+}$ ,  $\text{Hg}^{2+}$ ,  $\text{Al}^{3+}$ ,  $\text{Cr}^{3+}$ ,  $\text{F}^-$ ,  $\text{OAc}^-$ ,  $\text{H}_2\text{PO}_4^-$ ,  $\text{Cl}^-$ ,  $\text{Br}^-$ ,  $\text{I}^-$ ,  $\text{NO}_2^-$  and  $\text{HSO}_4^-$ ) in methanol water mixture (7:3, v/v)

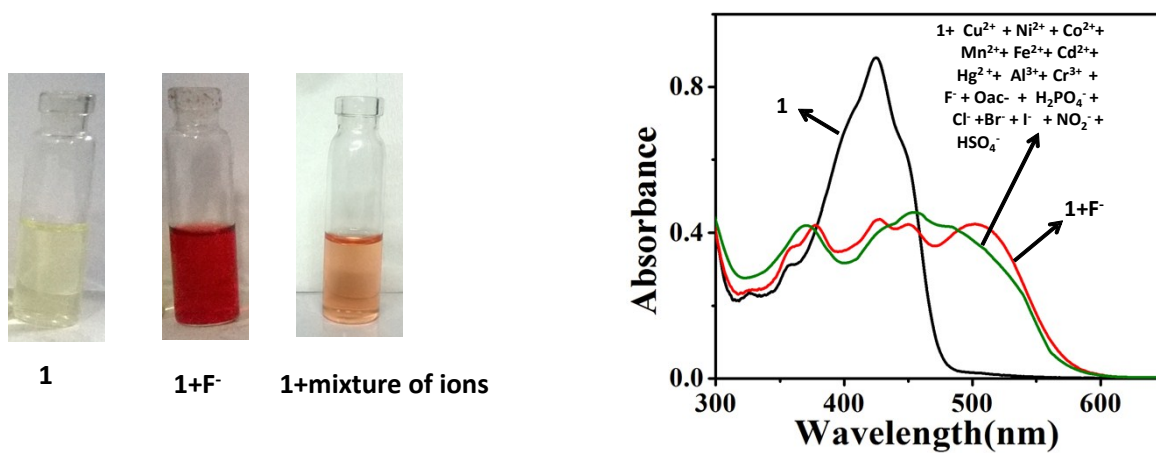

**Fig. S18** Naked-eye color change of **1** ( $1 \times 10^{-4}$  M) (left) and Uv-vis spectra of **1** ( $1 \times 10^{-6}$  M) (right) in bare fluoride and in mixture of ions ( $\text{Cu}^{2+}$ ,  $\text{Ni}^{2+}$ ,  $\text{Co}^{2+}$ ,  $\text{Mn}^{2+}$ ,  $\text{Fe}^{2+}$ ,  $\text{Cd}^{2+}$ ,  $\text{Hg}^{2+}$ ,  $\text{Al}^{3+}$ ,  $\text{Cr}^{3+}$ ,  $\text{F}^-$ ,  $\text{Oac}^-$ ,  $\text{H}_2\text{PO}_4^-$ ,  $\text{Cl}^-$ ,  $\text{Br}^-$ ,  $\text{I}^-$ ,  $\text{NO}_2^-$  and  $\text{HSO}_4^-$ ) in DMSO water mixture (7:3, v/v)

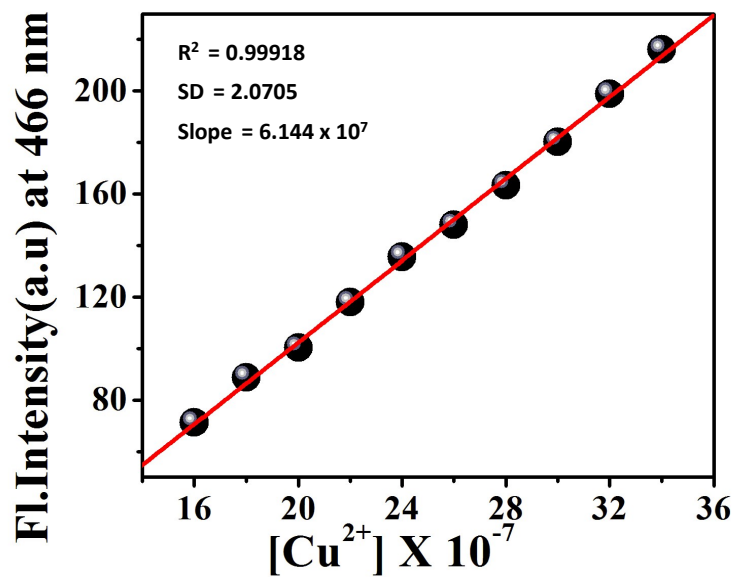

**Fig.S19** Determination of detection limit of  $Cu^{2+}$  by **1**( $1 \times 10^{-7}$ ) in methanol water mixture (7:3, v/v) at  $\lambda_{em} = 466nm$ .

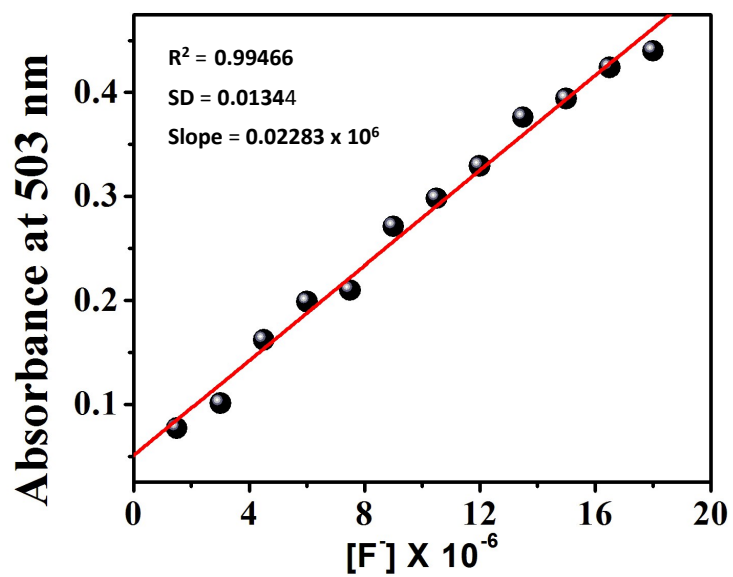

**Fig. S20** Determination of detection limit of F<sup>-</sup> by 1(1 × 10<sup>-6</sup>) in DMSO water mixture (7:3, v/v) at λ<sub>abs</sub> = 503 nm.

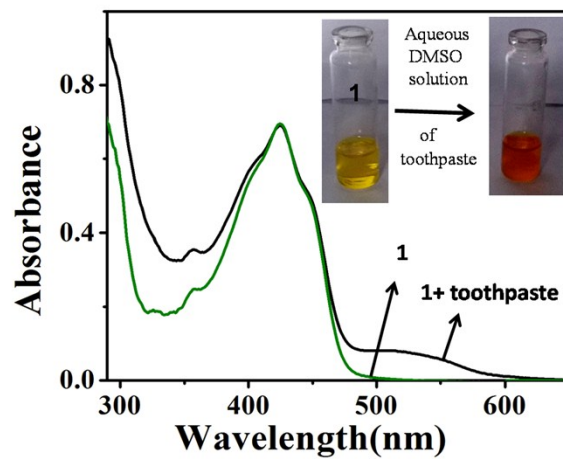

**Fig. S21** Uv-vis spectra of **1** ( $1 \times 10^{-5}$  M) and **1** in presence of toothpaste in aqueous DMSO solution and Naked-eye color change (inset).

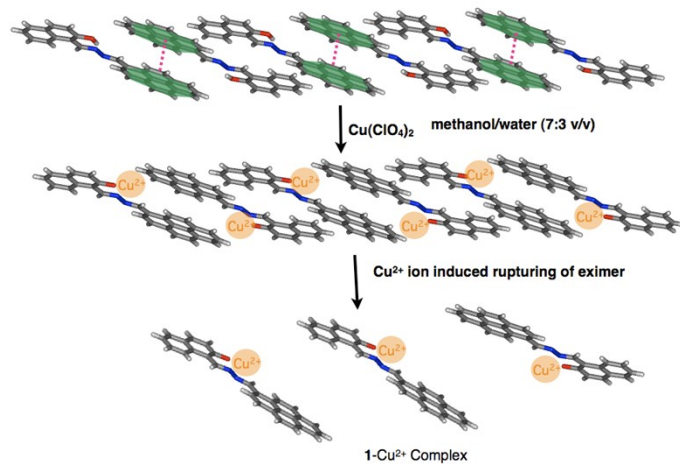

**Scheme S1.** The plausible representation of the complexation of **1** with  $\text{Cu}^{2+}$

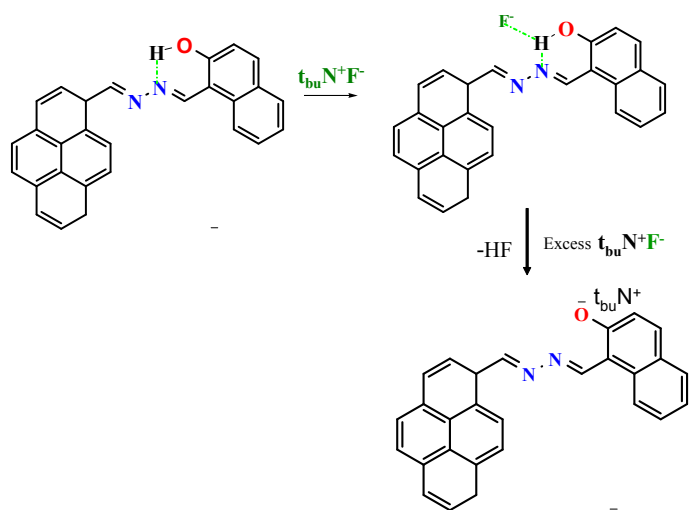

**Scheme S2.** The plausible representation of the H-bonded form and the deprotonated form of receptor **1**.
